# Supplementary material for: Overall water splitting under visible light irradiation over Ir and La-codoped NaTaO 3 photocatalysts
Source: Royal Society of Chemistry journal article supplement (doi:10.1039/d4ta05136j), 2024-01-01
Supplement: d4ta05136j1.pdf [file d4ta05136j1.pdf]

## Supplementary Information

### Overall water splitting under visible light irradiation over Ir and La-codoped NaTaO<sub>3</sub> photocatalysts

Akihide Iwase,\* Taichi Sato

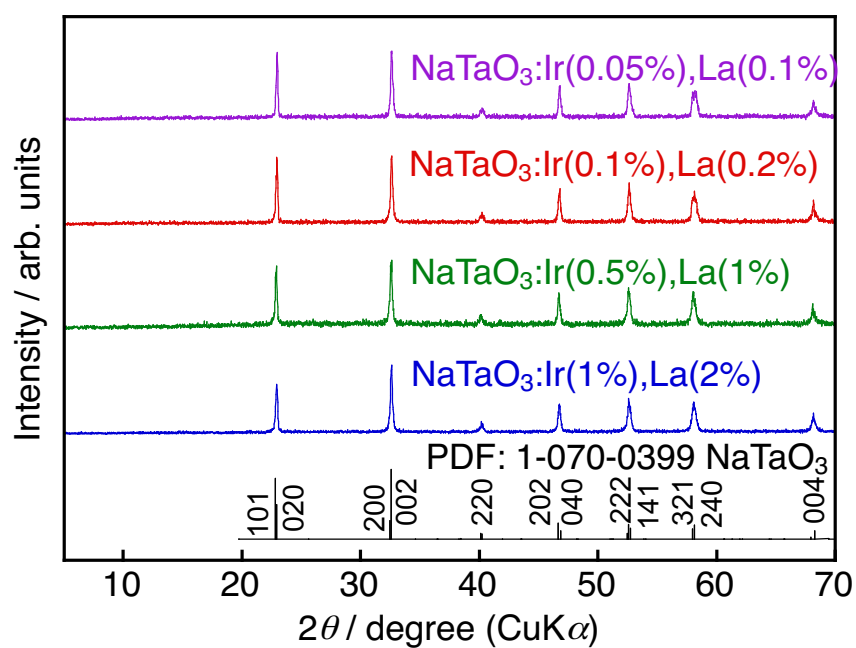

**Figure S1** XRD patterns of NaTaO<sub>3</sub>:Ir(x at%),La(2x at%) prepared at 1423 K by a solid-state reaction.

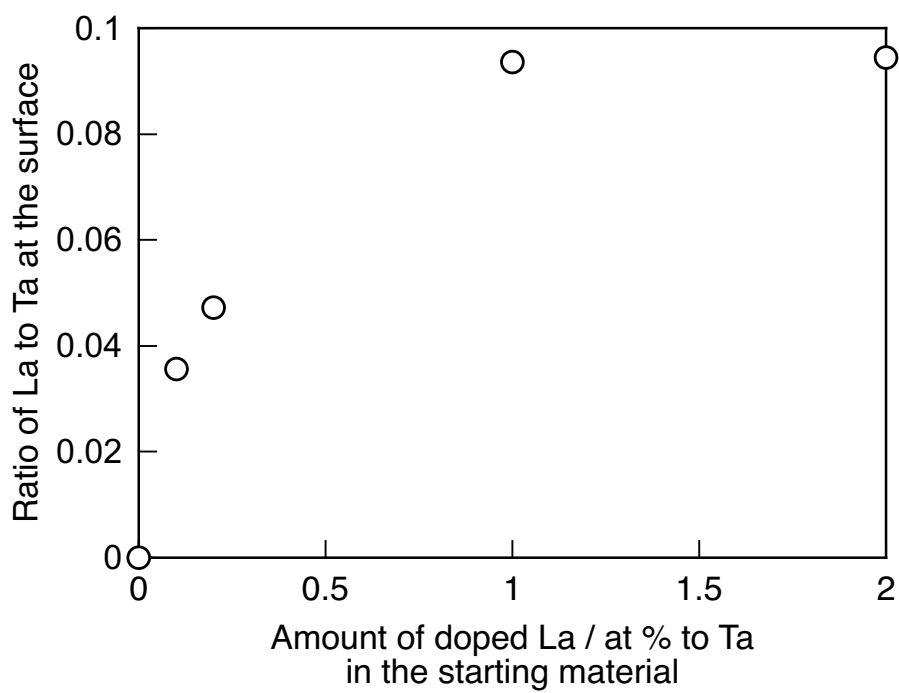

**Figure S2** Relationship between the amount of La in the starting material and the ratio of La to Ta at the surface of NaTaO<sub>3</sub> estimated from XPS.

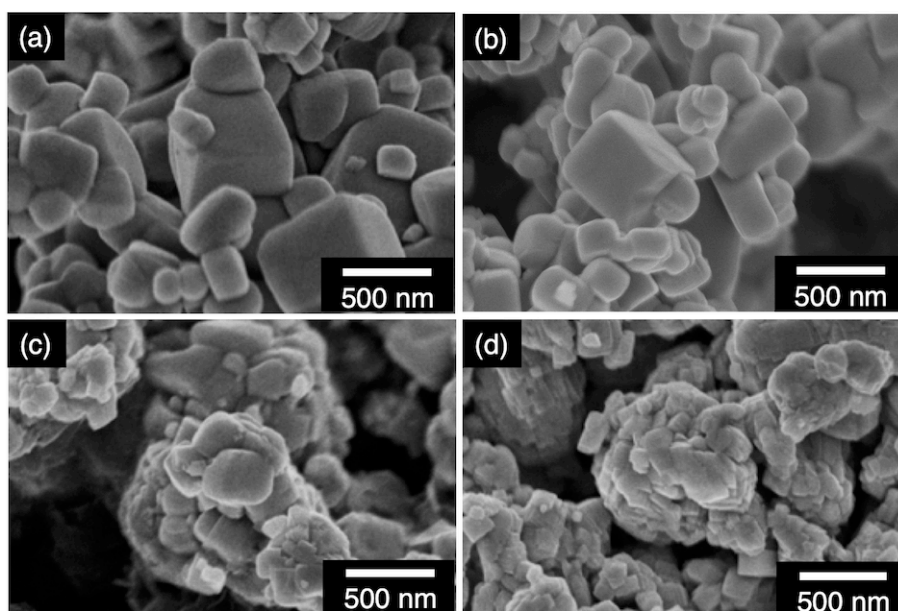

**Figure S3** SEM images of  $\text{NaTaO}_3:\text{Ir}(x \text{ at}\%),\text{La}(2x \text{ at}\%)$  prepared at 1423 K by a solid-state reaction. (a)  $x = 0.05$ , (b)  $x = 0.1$ , (c)  $x = 0.5$ , and (d)  $x = 1$ .

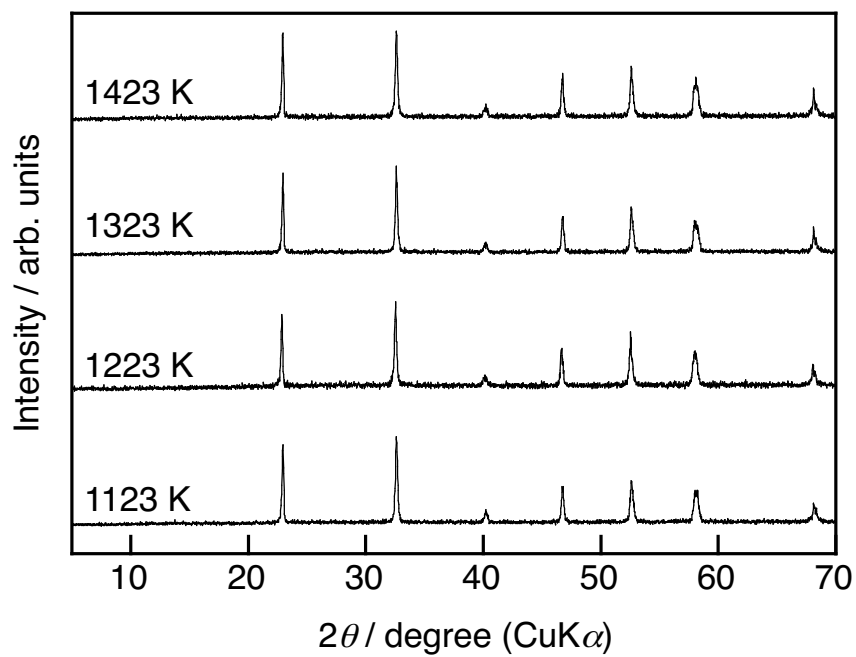

**Figure S4** XRD patterns of NaTaO<sub>3</sub>:Ir(0.1 at%),La(0.2 at%) prepared at various temperatures by a solid-state reaction.

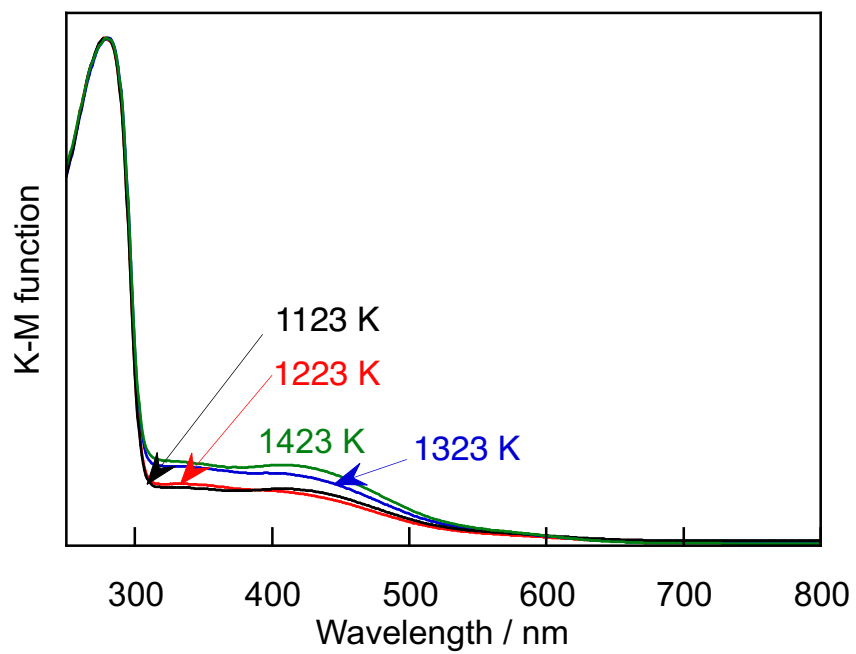

**Figure S5** Diffuse reflectance spectra of NaTaO<sub>3</sub>:Ir(0.1 at%),La(0.2 at%) prepared at various temperatures by a solid-state reaction.

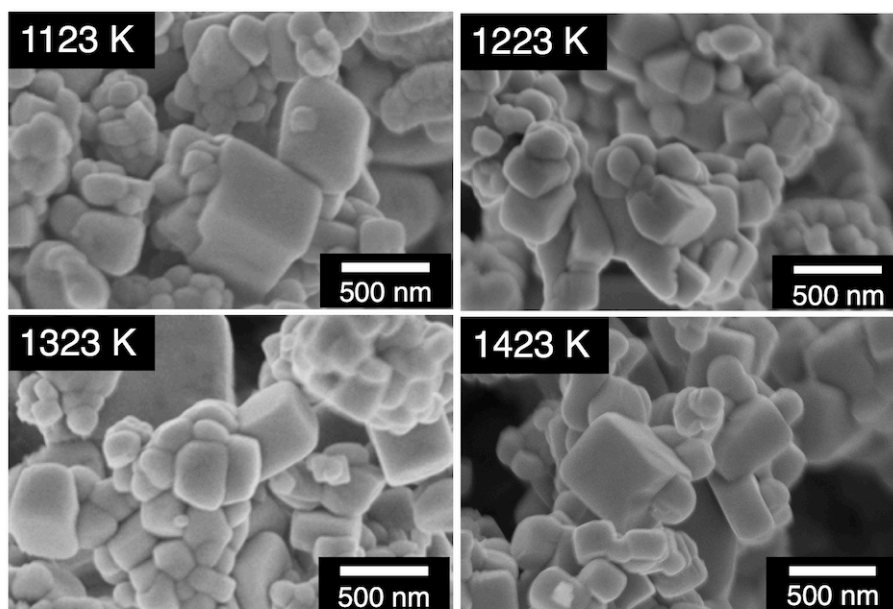

**Figure S6** SEM images of NaTaO<sub>3</sub>:Ir(0.1 at%),La(0.2 at%) prepared at various temperatures by a solid-state reaction.

**Table S1** Photocatalytic water splitting under visible light irradiation over Rh(0.05 wt%)/Cr<sub>2</sub>O<sub>3</sub>(0.038 wt%)-loaded NaTaO<sub>3</sub>:Ir(0.1 at%),La(0.2 at%)

| Calcination temperature / K | Specific surface area / m <sup>2</sup> g <sup>-1</sup> | Activity / μmol h <sup>-1</sup> |                |
|-----------------------------|--------------------------------------------------------|---------------------------------|----------------|
|                             |                                                        | H <sub>2</sub>                  | O <sub>2</sub> |
| 1123                        | 2.3                                                    | 2.1                             | 0.9            |
| 1223                        | 2.3                                                    | 2.2                             | 0.9            |
| 1323                        | 2.0                                                    | 1.0                             | 0.4            |
| 1423                        | 1.7                                                    | 1.0                             | 0.4            |

Photocatalyst: 0.3 g, reactant solution: water 120 mL, cell: top-irradiation cell with a Pyrex window, light source: 300 W Xe lamp ( $\lambda > 420$  nm, L42 HOYA).

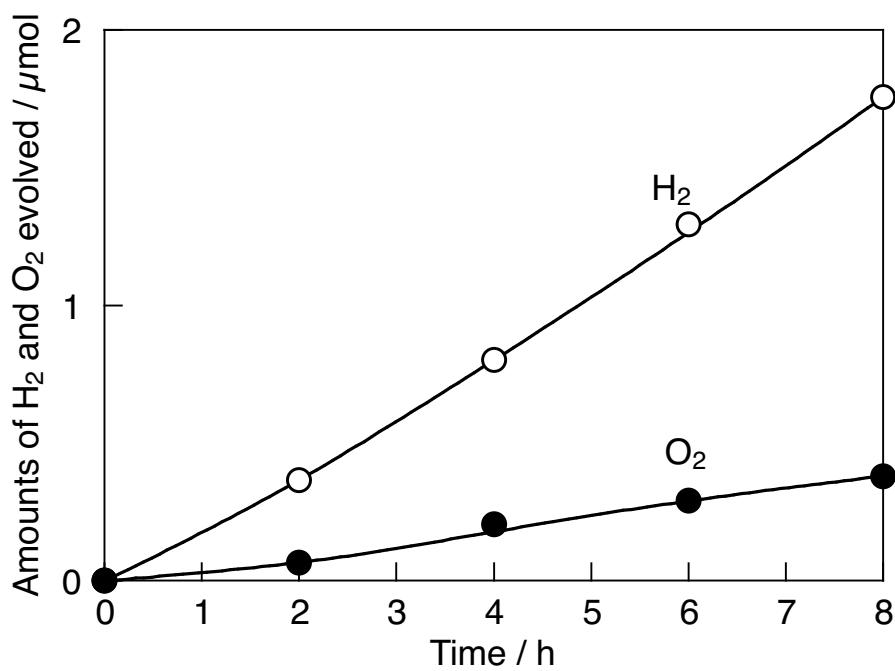

**Figure S7** Overall water splitting over NiO(0.2 wt%)-loaded NaTaO<sub>3</sub>:Ir(0.1%),La(0.2%) under visible light irradiation. Photocatalyst: 0.3 g, reactant solution: water 120 mL, light source: 300 W Xe lamp with a long-pass filter ( $\lambda > 420$  nm, HOYA L42), cell: top-irradiation cell with a Pyrex window. The sample was prepared at 1423 K by a solid-state reaction.
